# Supplementary material for: Using phage display selected antibodies to dissect microbiomes for complete de novo genome sequencing of low abundance microbes
Source: PubMed Central journal article supplement (PMC3907030; doi:10.1186/1471-2180-13-270), 2013-11-27
Supplement: 1471-2180-13-270-S1.pdf [file 1471-2180-13-270-S1.pdf]

Additional File 1. Sequence alignment of the four scFvs selected against *L. acidophilus*.  
HCDR3 sequences are highlighted in yellow.

```

α -La1    GAHASYELTQPPSASGTPGQRVTIISCSGSSSNIGS-NYVYWYQQLPGTAPKLLIYRNNQR 59
α -La2    GAHAQSVLTQPASVSGSPGQSITISCTGTSSDVGSYNYVSWYQHPGKAPKLMIDVSNR 60
α -La3    GAHASYVLTQPPSVSGTTPGQRVTIISCSGSSSNIER-NYVYWYQQLPGTAPKLLIYRNNQR 59
α -La4    GAHAQAVVTQEPSASETPGQRVTIISCSGSDSNIGS-NYVYWYQQVPGTAPKLVYRNNQR 59
          ****. :** .*. * :*** :*****:*. *:: *** ***** ** .*****:** .:*

α -La1    PSGVPDRFSGSKSGTSASLAITGLQAEDEADYYCQSYDSSLSGYVFGTRTKLTVLSGGST 119
α -La2    PSGVSNRFSGSKSGNTASLTISGLQAEDEADYYCSSYTSS-STNVFGTGTQLTVLSGGST 119
α -La3    PSGVPDRFSGSKSGTSASLAISGLRSEDEADYYCAAWDDSQNAYVFGTGTKLTVLSGGST 119
α -La4    PSGVPDRFSGSKSGTSASLGIRGLQSEDEADYYCAAWDDSVSGWVFGGRTKLTVLSGGST 119
          ****. :*****. :*** * *::***** :. * . *** * :*****

α -La1    ITSYNVYDTKLSSSGTQVQLQOSGPGLVKPSQTLSLACAIISGDSVSSNSAAWNWIROSPS 179
α -La2    ITSSNVYYTKLSSSGTEVQLVETGGGLVKPGGSLRLSCAASGFTLSN--AWMHWVRQAPG 177
α -La3    ITSYNVYYTKLSSSGTQVQLQESGPGLVKPSSETLSLTCAISGDSVSSNSAAWNWIROSPS 179
α -La4    ITSYNVYYTKLSSSGTQVQLQOSGPGLVKPSQILSLTCAISGDSVSSNSADWNWIROSPS 179
          *** ** *****:*** :.* *****. * *:* ** * :.*. * :*:**:*

α -La1    RGLEWLGRIYYRSK-WYNDYAVSVKSRITINPDTSKNQFSLQLNSVTPEDTAVYYCCARER 238
α -La2    KGLEWVGRIRKTDGGTTDYAAPVKGRFTISRDDSKNTLYLQMNSLKTEDTAVYYCSTD- 236
α -La3    RGLEWLGRTYYRSK-WYNDYAVSVKSRITINPDTSKNQFSLQLNSVTPEDTAVYYCCATG- 237
α -La4    RGLEWLGRTYYRSK-WYNDYAVLVKSRITINPDTSKNQFSLQLNSVTPEDTAVYYCCARGS 238
          :****:* * :. .***. *. *:* * * ** * : *:*:* :.*****:

α -La1    YGAFDIWGQGMVTVSSASGKPIPNPLLGLDST 271
α -La2    -DYGGNWGQGLTVTVSSASGKPIPNPLLGLDST 268
α -La3    -DAFDMWGQGMVTVSSASGKPIPNPLLGLDST 269
α -La4    LGAFDIWGQGMVTVSSASGKPIPNPLLGLDST 271
          . . *****:*****

```
