# Supplementary material for: Using phage display selected antibodies to dissect microbiomes for complete de novo genome sequencing of low abundance microbes
Source: PubMed Central journal article supplement (PMC3907030; doi:10.1186/1471-2180-13-270), 2013-11-27
Supplement: 1471-2180-13-270-S2.pdf [file 1471-2180-13-270-S2.pdf]

## Additional File 2

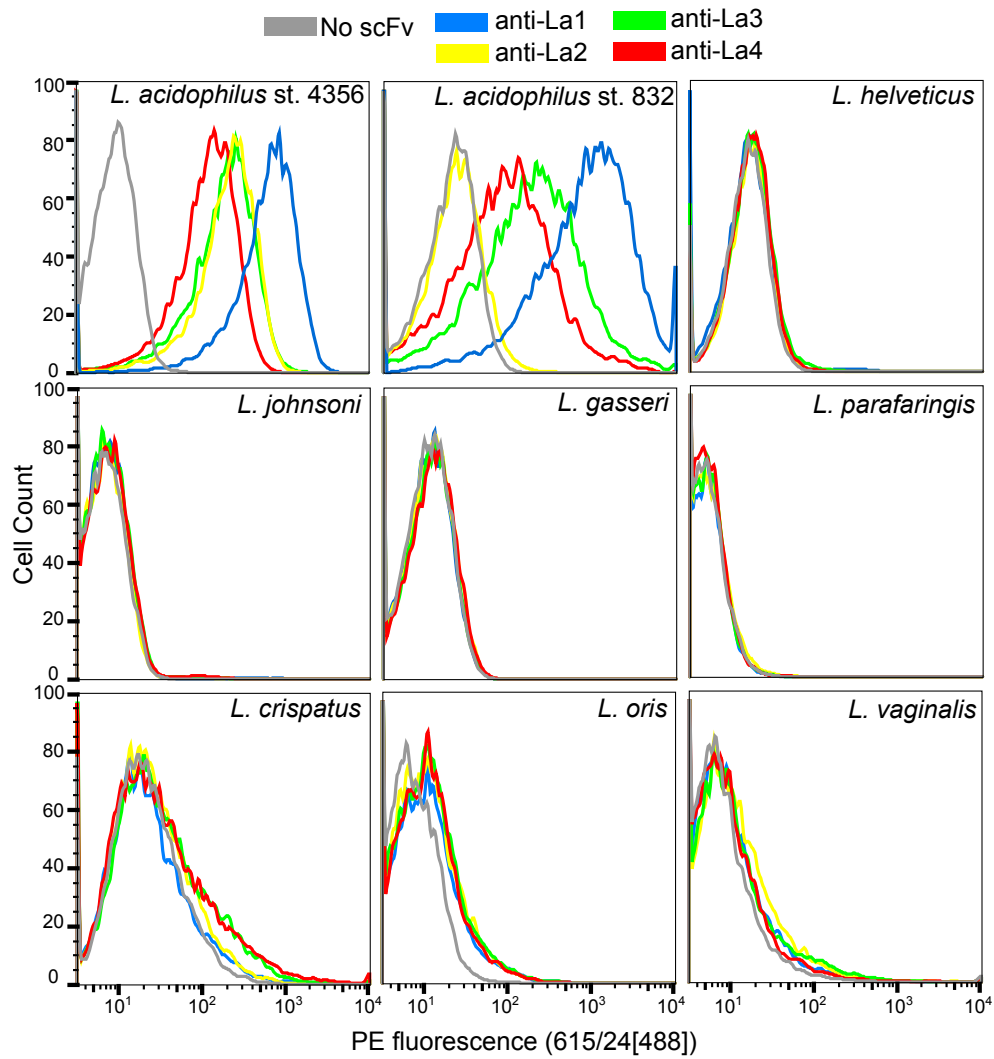

Binding of the four unique anti-La scFVs to different Lactobacillus species using scFv culture supernatant and flow cytometry. The anti-La scFVs are all specific to *L. acidophilus* and the anti-La2 may discriminate between *L. acidophilus* strains.
