# Supplementary material for: Using phage display selected antibodies to dissect microbiomes for complete de novo genome sequencing of low abundance microbes
Source: PubMed Central journal article supplement (PMC3907030; doi:10.1186/1471-2180-13-270), 2013-11-27
Supplement: 1471-2180-13-270-S3.pdf [file 1471-2180-13-270-S3.pdf]

Additional File 3

|                  |             | <b>Bacterial Isolates Identified After Sorting</b> |                        |                    |                           |                                       |                                  |                                  |                            |                      |                     |                       |              |
|------------------|-------------|----------------------------------------------------|------------------------|--------------------|---------------------------|---------------------------------------|----------------------------------|----------------------------------|----------------------------|----------------------|---------------------|-----------------------|--------------|
| <b>Replicate</b> | <b>Gate</b> | <i>Streptococcus</i> sp.                           | <i>Rhodococcus</i> sp. | <i>Dietzia</i> sp. | <i>Bradyrhizobium</i> sp. | <i>Escherichia</i> or <i>Shigella</i> | <i>Lactobacillus acidophilus</i> | <i>Lactobacillus delbrueckii</i> | <i>Corynebacterium</i> sp. | <i>Rhizobium</i> sp. | <i>Bacillus</i> sp. | <i>Variovorax</i> sp. | <b>Total</b> |
| <b>A</b>         | <b>P1</b>   | 18                                                 | 4                      | 0                  | 0                         | 1                                     | 4                                | 1                                | 0                          | 0                    | 0                   | 1                     | 29           |
|                  | <b>P2</b>   | 18                                                 | 1                      | 0                  | 0                         | 0                                     | 0                                | 2                                | 1                          | 0                    | 0                   | 0                     | 22           |
|                  | <b>P3</b>   | 2                                                  | 2                      | 1                  | 1                         | 0                                     | 17                               | 1                                | 0                          | 0                    | 0                   | 0                     | 24           |
| <b>B</b>         | <b>P1</b>   | 23                                                 | 0                      | 0                  | 0                         | 0                                     | 0                                | 2                                | 0                          | 0                    | 1                   | 0                     | 26           |
|                  | <b>P2</b>   | 24                                                 | 0                      | 0                  | 0                         | 0                                     | 0                                | 0                                | 0                          | 0                    | 0                   | 0                     | 24           |
|                  | <b>P3</b>   | 0                                                  | 0                      | 0                  | 0                         | 0                                     | 4                                | 0                                | 0                          | 0                    | 0                   | 0                     | 4            |
| <b>C</b>         | <b>P1</b>   | 17                                                 | 0                      | 0                  | 0                         | 0                                     | 0                                | 2                                | 0                          | 0                    | 0                   | 0                     | 19           |
|                  | <b>P2</b>   | 13                                                 | 0                      | 0                  | 0                         | 0                                     | 0                                | 0                                | 0                          | 0                    | 0                   | 0                     | 13           |
|                  | <b>P3</b>   | 0                                                  | 0                      | 0                  | 0                         | 0                                     | 6                                | 0                                | 0                          | 0                    | 0                   | 0                     | 6            |
| <b>D</b>         | <b>P1</b>   | 28                                                 | 0                      | 0                  | 0                         | 0                                     | 0                                | 1                                | 0                          | 1                    | 0                   | 0                     | 30           |
|                  | <b>P2</b>   | 35                                                 | 0                      | 0                  | 0                         | 0                                     | 0                                | 0                                | 0                          | 0                    | 0                   | 0                     | 35           |
|                  | <b>P3</b>   | 1                                                  | 0                      | 0                  | 0                         | 0                                     | 11                               | 0                                | 0                          | 0                    | 0                   | 0                     | 12           |

Bacteria identified in various gates after single cell sorting and classification. Approximately 88 cells were sorted from each gate for each replicate. Species identities reported at >94% maximum identity by Blastn search of the 16S rDNA sequences. Replicates are different bacteria preps isolated from yogurt cultures and the gates correspond to gates shown in Fig. 4 of the main text.
